# Supplementary material for: Three-dimensional MOF-derived Co and N co-doped porous carbon bifunctional catalyst for the Zn–air battery
Source: Royal Society of Chemistry journal article supplement (doi:10.1039/d1ce00761k), 2021-01-01
Supplement: d1ce00761k1.pdf [file d1ce00761k1.pdf]

## Supplementary Information

### Three-dimensional MOF-derived Co and N co-doped porous carbon bifunctional catalyst for Zn-air battery

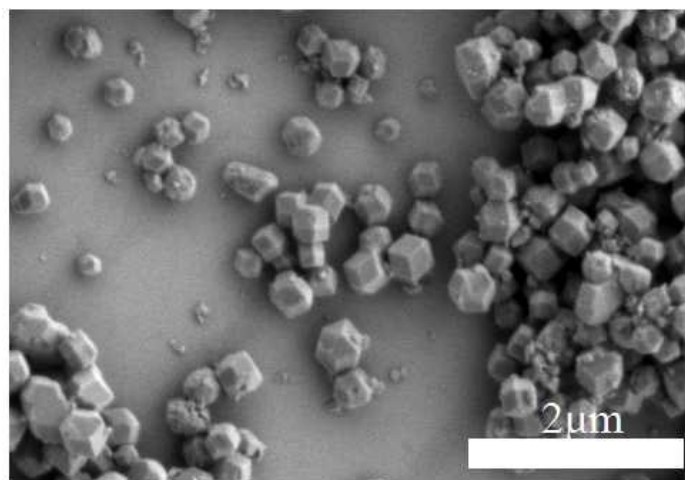

Figure S1. SEM image of ZnCo-ZIF.

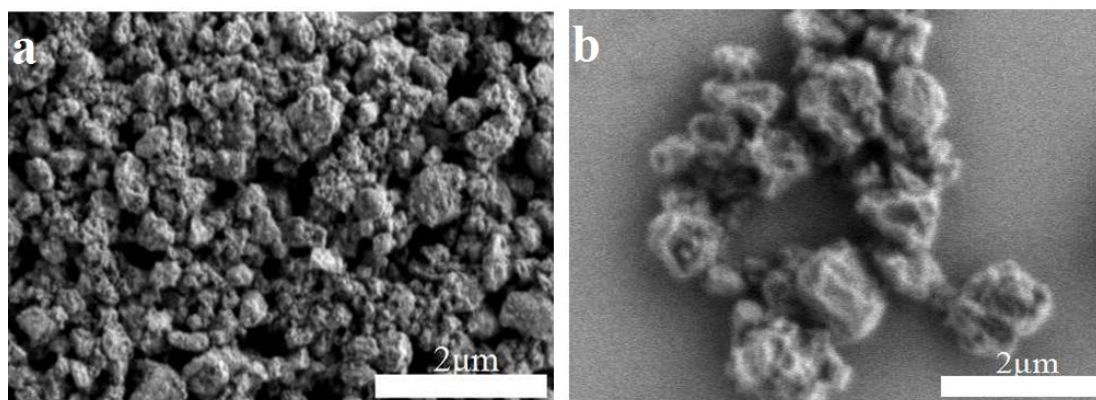

Figure S2. a) SEM image of Co-N-PC-0.5. b) SEM image of Co-N-PC-2.

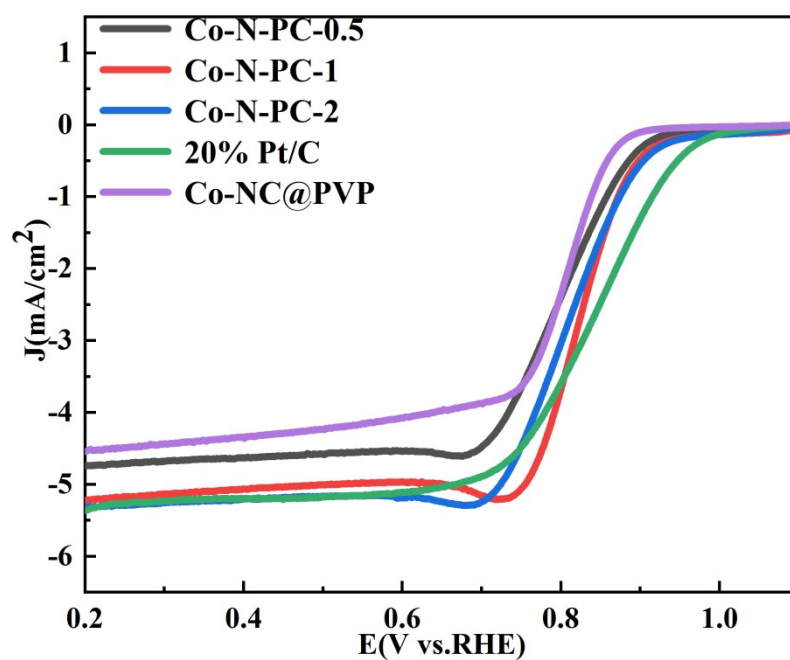

Figure S3. The ORR polarization curves of Co-NC@PVP and Co-N-PC-800 catalysts with different Zn/Co ratio in 0.1 M KOH at 1600 rpm.

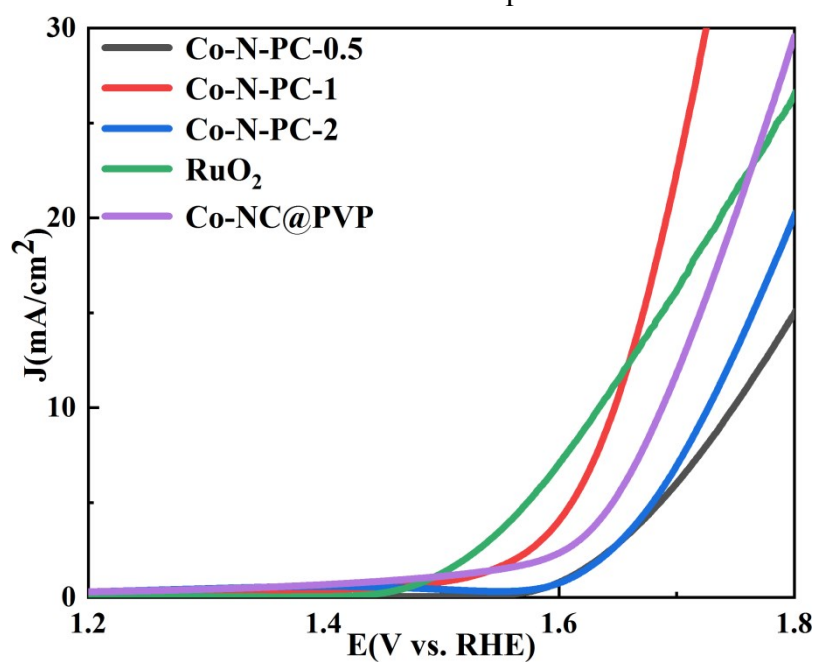

Figure S4. The OER polarization curves of Co-NC@PVP and Co-N-PC-800 catalysts with different Zn/Co ratio in 0.1 M KOH at 1600 rpm.

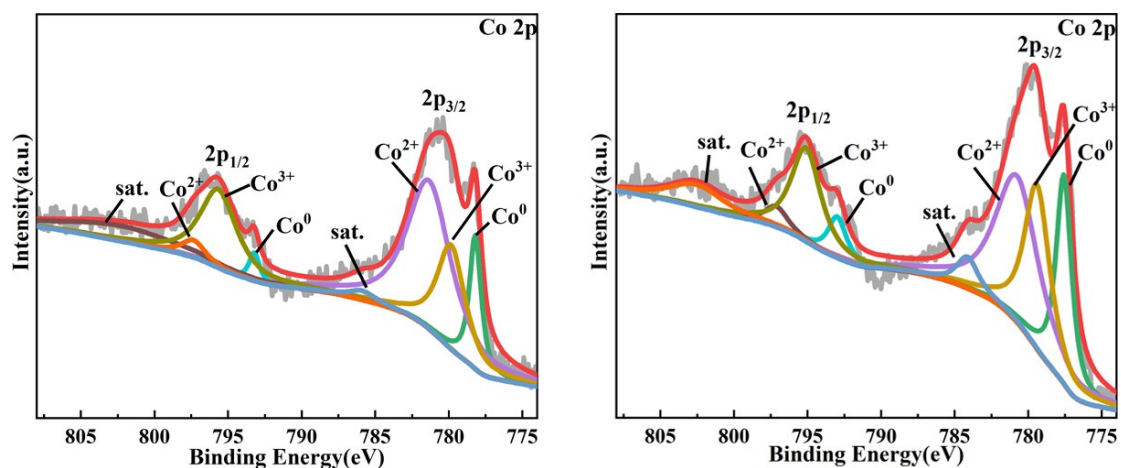

Figure S5. Co 2p XPS high-resolution spectra of Co-N-PC-700 a) and Co-N-PC-900 b).

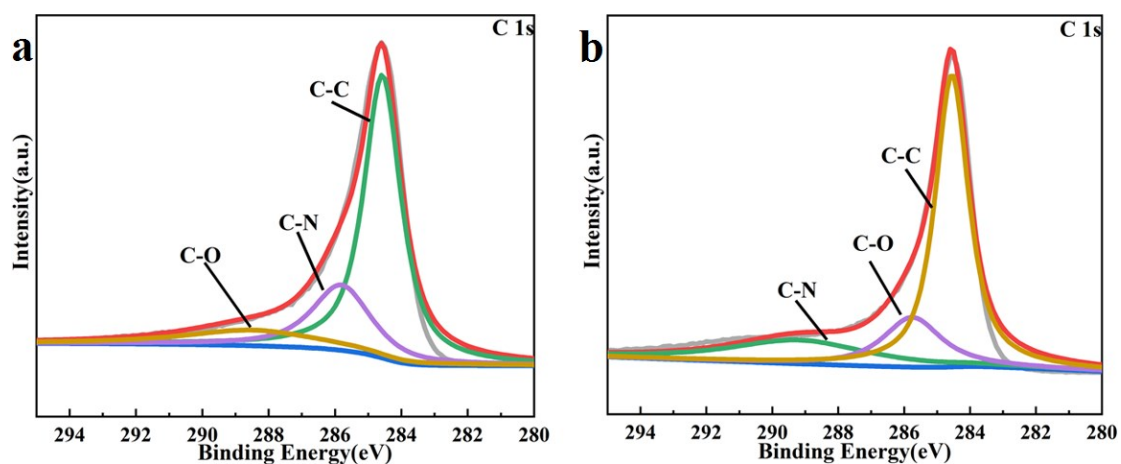

Figure S6. C 1s XPS high-resolution spectra of Co-N-PC-700 a) and Co-N-PC-900 b).

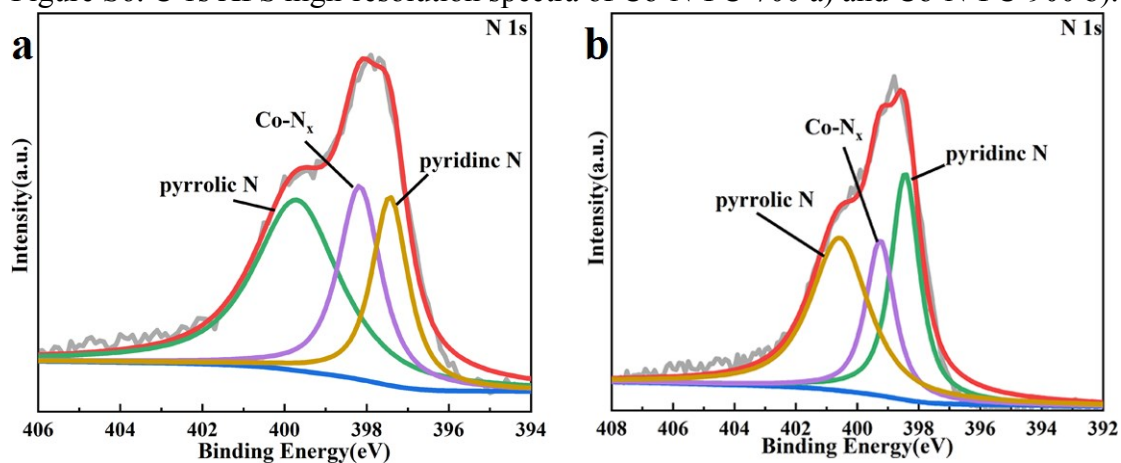

Figure S7. N 1s XPS high-resolution spectra of Co-N-PC-700 a) and Co-N-PC-900 b).

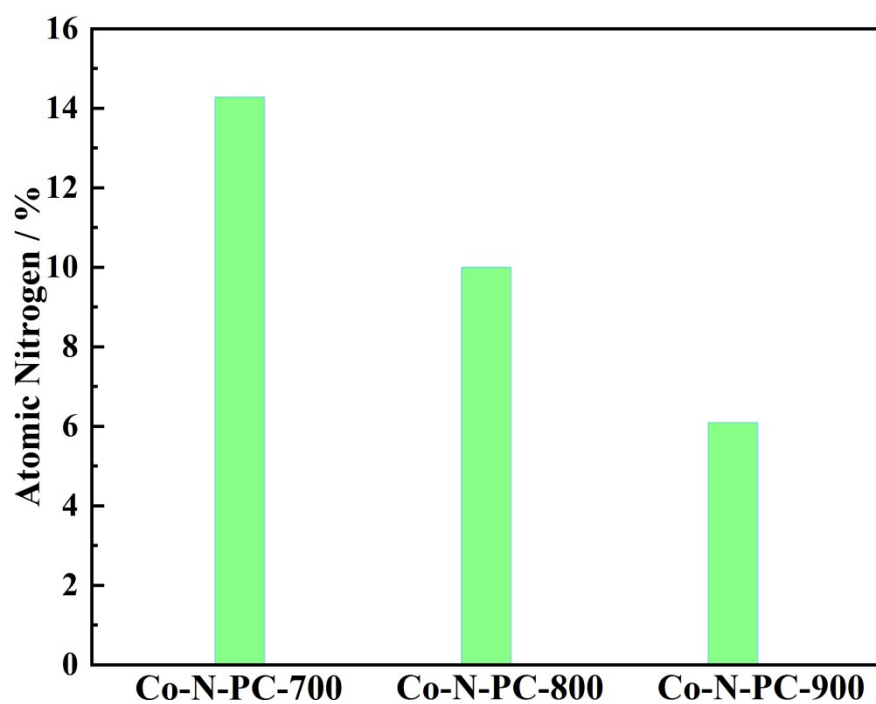

Figure S8. Atomic nitrogen-content of Co-N-PC-700, Co-N-PC-800 and Co-N-PC-900.

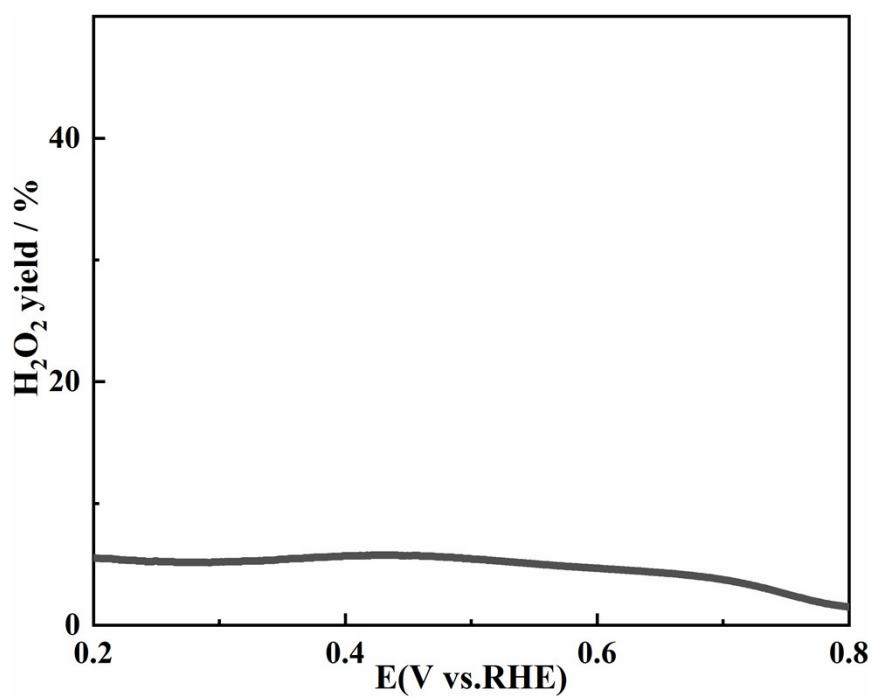

Figure S9. Commercial 20% Pt/C catalyst the yield of  $\text{H}_2\text{O}_2$ .

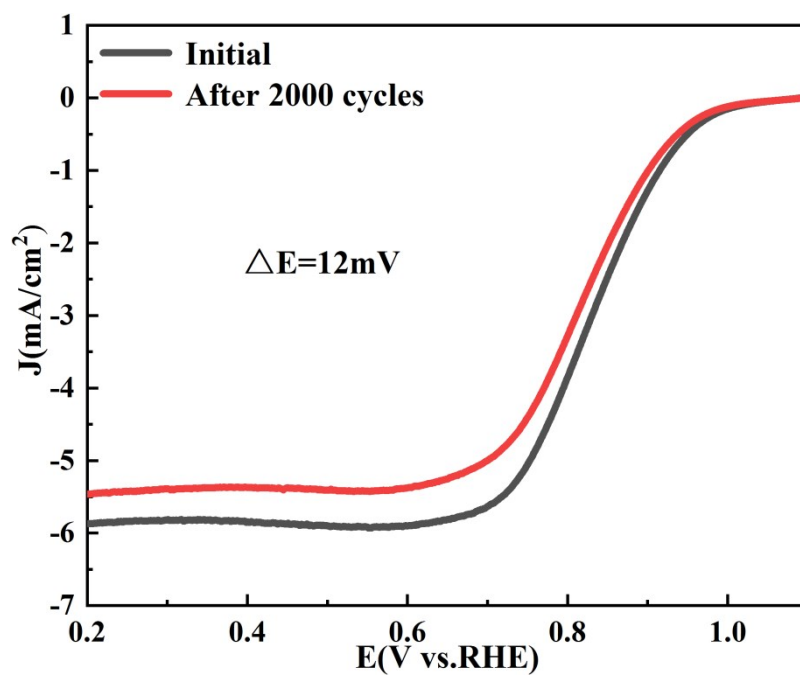

Figure S10. Commercial 20% Pt/C catalyst for initial cycle and after 2000 cycles.

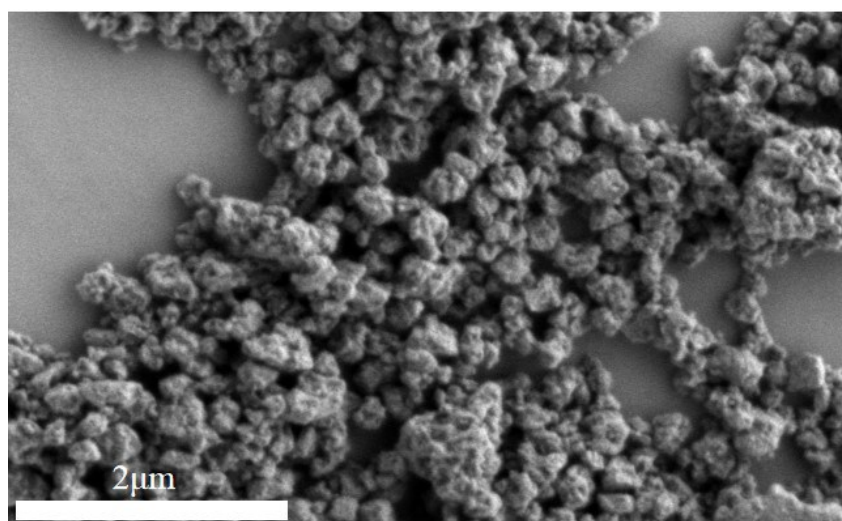

Figure S11. SEM image of Co-N-PC-800 assembled battery after cycling test.

Table S1 XPS 2P<sub>3/2</sub> spectra information for each Co-N-PC-T samples of Co ions.

| Sample<br>Ion    | Co-N-PC-700 | Co-N-PC-800 | Co-N-PC-900 |
|------------------|-------------|-------------|-------------|
| Co               | 14.12%      | 20.04%      | 22.57%      |
| Co <sup>2+</sup> | 57.79%      | 30.39%      | 43.75%      |
| Co <sup>3+</sup> | 25.96%      | 40.71%      | 28.96%      |

Table S2 EDS of the ZnCo-MOF@PVP and Co-N-PC-800 catalyst.

| Sample<br>Element<br>(weight%) | ZnCo-MOF@PVP | Co-N-PC-800 |
|--------------------------------|--------------|-------------|
| C                              | 44.45%       | 56.31%      |
| N                              | 37.70%       | 32.87%      |
| Co                             | 7.79%        | 10.15%      |
| Zn                             | 10.07%       | 0.66%       |
